# Supplementary material for: Behavioral Influences on Crowdfunding SDG Initiatives: The Importance of Personality and Subjective Well-Being
Source: MDPI journal article supplement (doi:10.3390/su13073796), 2021-03-30
Supplement: s1 [file s1]

## Supplemental A. Questionnaire.

### Survey on crowdfunding for sustainability

We are conducting this survey to understand crowdfunding behavior with respect to sustainability. The term crowdfunding for sustainability refers to crowdfunding projects related to the 17 United Nations sustainable development goals (SDGs), which can be also used interchangeably with 'sustainability crowdfunding' in this study. This approach is used as it gives a much wider appreciation of the direct and indirect contribution of organizations, small and medium enterprises, startups, individual fundraisers, platforms, and funders to sustainability. This study is supported by the National Research Foundation of Korea (NRFK) and OOO University. Your sincere response will contribute to our understanding of crowdfunding for sustainability and how crowdfunding may contribute to the SDGs. Your response is completely anonymous and will be used only for academic purpose.

We greatly appreciate your time and cooperation in completing this questionnaire.

Thank you very much!

*Names of the researchers and university are eliminated for anonymity.  
The layout of this questionnaire in English is only for MS word file which is quite different  
from the online survey screen in Korean.*

March 11 – March 23, 2020

**Note 1:** In this survey, the term **crowdfunding** is defined as the practice of funding a project or venture by raising small amounts of money from a large number of people, typically via the Internet, which represents a form of crowdsourcing and alternative financing for donation, reward (products or services), and/or investment (equity and lending).

**Note 2:** In September 2015 by the 70<sup>th</sup> UN general Assembly, the General Assembly adopted the 2030 Agenda for Sustainable Development that includes 17 Sustainable Development Goals (SDGs). Building on the principle of “leaving no one behind”, the new Agenda emphasizes a holistic approach to achieving sustainable development for all with human, earth, prosperity, peace, and partnership, along with specific 167 SDGs.

In this survey, the term **crowdfunding for sustainability** refers to crowdfunding for the 17 SDGs as follows: SDG1: Poverty reduction; SDG2: Reducing hunger/sustainable agriculture and food; SDG3: Public health and well-being; SDG4: Inclusive and equitable quality education and lifelong learning; SDG5: Gender equality/empowerment for women and girls; SDG6: Clean water and public sanitation; SDG7: Sustainable energy; SDG8: Green business practices/employment; SDG9: Sustainable infrastructure/environmentally sound technologies and industrial processes; SDG10: Projects in Korea/developing countries that reduce socio-economic inequalities; SDG11: Safe and sustainable housing/sustainable transport/green and public space; SDG12: Waste reduction and recycling; SDG13: Climate change; SDG14: Sustainable oceans and marine resource conservation; SDG15: Terrestrial biodiversity (fauna, flora, ecosystem) conservation/combat desertification/reduce illegal wildlife trade; SDG16: Promote peaceful and inclusive societies and reduce violence; and/or SDG17: Global partnership: Technology/financial transfer to developing countries.

#### Screen question (SQ)

**SQ1. In the past 12 months, have you participated in any crowdfunding projects for sustainability?**

① No ➡ If you checked “No” please answer the following SQ2 question.

**SQ2. Please tell us the most relevant reason why you have not participated in any crowdfunding projects (e.g., donation, reward, investment) for sustainability.**

Reasons: ① Risks ② Lack of information ③ Don't know how to do it ④ Not enough money  
⑤ I would rather crowdfund other areas than sustainability

Thank you for your participation in this survey.

② Yes ➡ If you checked “yes,” please answer the following DQ1 questions.

### **Demographic characteristics[Quota]**

**DQ1. What is your gender?**

① Male ② Female

**DQ2. What is your year of birth? \_\_\_\_\_ year. Are you?**

① Less than 20 years old  
② 20~29 years old  
③ 30~39 years old  
④ 40~49 years old  
⑤ 50~59 years old  
⑥ 60 years old or over

### **General information**

GQ1. How long have you been participating in crowdfunding?  
\_\_\_\_\_ months (e.g., 12 months)

GQ2. Please select all of the following types of crowdfunding that you have participated in regardless of the area that you funded.

① Donation: Funds are donated to a specific crowdfunding project without expecting any return.  
② Reward: Funds are invested in a specific crowdfunding project expecting a service or product return.  
③ Equity/bond: Funds are invested in start-ups or entrepreneurs to receive compensation for stocks/bonds.  
④ Lending: Money is lent to start-ups or individuals with an expectation that it will be returned to the funder with interest in the future.  
⑤ Other (please identify): \_\_\_\_\_

GQ3\_1. Please check the descriptor that best identifies how often you invest in crowdfunding projects:

① Daily ② Weekly ③ Monthly ④ Quarterly ⑤ Yearly

GQ3\_2. On average, how much money do you invest in each crowdfunding project?

\_\_\_\_\_ Won (e.g., 50,000 Won)

GQ4\_1. Please check the descriptor that best identifies how often you invest in crowdfunding projects for sustainability:

- ① Daily ② Weekly ③ Monthly ④ Quarterly ⑤ Yearly

GQ4\_2. On average, how much money do you invest in each crowdfunding project for sustainability?

\_\_\_\_\_ Won (e.g., 50,000 Won)

GQ5. What is your primary reason for participating in crowdfunding for sustainability?

- ① Donation: Funds are donated to a specific crowdfunding project without expecting any return.  
 ② Reward: Funds are invested in a specific crowdfunding project expecting a service or product return.  
 ③ Equity/bond: Funds are invested in start-ups or entrepreneurs to receive compensation for stocks/bonds.  
 ④ Lending: An unspecified number of people are lending money to start-ups or individuals by borrowers' funding management plan and credit information.  
 ⑤ Other (please identify): \_\_\_\_\_

**CQ0. Please provide the name and description of the crowdfunding for sustainability project and platform in which you have most recently participated:**

CQ0\_1. What is the name of the most recent crowdfunding for sustainability project in which you have participated?

CQ0\_2. Please *select one* of the 17 following areas that best describe your most recent crowdfunding for sustainability project. [Select one]

- ① poverty reduction, ② reducing hunger/sustainable agriculture and food, ③ public health and well-being, ④ inclusive and equitable quality education and lifelong learning, ⑤ gender equality/empowerment for women and girls, ⑥ clean water and public sanitation, ⑦ sustainable energy, ⑧ green business practices/employment, ⑨ sustainable infrastructure/environmentally sound technologies and industrial processes, ⑩ projects in Korea/developing countries that reduce socio-economic inequalities, ⑪ safe and sustainable housing/sustainable transport/green and public space, ⑫ waste reduction and recycling, ⑬ climate change, ⑭ sustainable oceans and marine resource conservation, ⑮ terrestrial biodiversity (fauna, flora, ecosystem) conservation/combate desertification/reduce illegal wildlife trade, ⑯ promote peaceful and inclusive societies/reduce violence, or ⑰ technology/financial transfer to developing countries.

CQ0\_3. What are the financial characteristics of your most recent crowdfunding project for sustainability (CQ0\_1 response value)? [Select one]

- ① A for-profit crowdfunding project ② As non-profit crowdfunding project ③ Don't know

CQ0\_4. On what platform (site) did you participate in the crowdfunding project for sustainability that you most recently joined (CQ0\_1 response value)? [Select one]

- ① OhMyCompany ② Wadiz ③ Crowdy ④ Tumblebug ⑤ HappyBean ⑥ Others (Describe the

name of platform/site): \_\_\_\_\_

CQ0\_5\_1. Have you ever been involved in crowdfunding outside of Korea? [Select one]

① Yes ② No

CQ0\_5\_2. What is the most recent crowdfunding project from outside of Korea that you participated in? \_\_\_\_\_

Please also provide project and country name and date:

- 1) Name of platform in which you participated: \_\_\_\_\_
- 2) Name of country in which project was situated: \_\_\_\_\_
- 3) Date of participation (e.g., April 2019): \_\_\_\_\_

CQ0\_6\_1. Have you ever been involved in crowdfunding for ? outside of Korea? [Select one]

① Yes ② No (→Move to CQ1)

CQ0\_6\_2. What is the most recent crowdfunding for sustainability project from outside of Korea that you participated in? \_\_\_\_\_

Please also provide country name and date:

- 1) Name of platform in which you participated: \_\_\_\_\_
- 2) Name of country in which project was situated: \_\_\_\_\_
- 3) Date of participation (e.g., January 2020): \_\_\_\_\_
- 4) Main type of sustainability crowdfunding in which you participated (please refer to list below and provide a number of SDG): \_\_\_\_\_

***SDG1: Poverty reduction; SDG2: Reducing hunger/sustainable agriculture and food; SDG3: Public health and well-being; SDG4: Inclusive and equitable quality education and lifelong learning; SDG5: Gender equality/empowerment for women and girls; SDG6: Clean water and public sanitation; SDG7: Sustainable energy; SDG8: Green business practices/employment; SDG9: Sustainable infrastructure/environmentally sound technologies and industrial processes; SDG10: Projects in Korea/developing countries that reduce socio-economic inequalities; SDG11: Safe and sustainable housing/sustainable transport/green and public space; SDG12: Waste reduction and recycling; SDG13: Climate change; SDG14: Sustainable oceans and marine resource conservation; SDG15: Terrestrial biodiversity (fauna, flora, ecosystem) conservation/combat desertification/reduce illegal wildlife trade; SDG16: Promote peaceful and inclusive societies and reduce violence; and/or SDG17: Global partnership: Technology/financial transfer to developing countries).***

CQ0\_7. Which of the following non-crowdfunding means of support for sustainability have you participated in over the past 12 months? [Select one]

- ① Donation: Funds are donated to a specific sustainability project without expecting any personal return.
- ② Reward: Funds are invested in a specific sustainability project with an expected personal service or product return.
- ③ Equity/bond: Funds are invested in sustainability start-ups or entrepreneurs in order to receive compensation for stocks/bonds.
- ④ Lending: Money is lent to start-ups or individuals by borrowers on the expectation it will be returned.
- ⑤ Volunteering: Time and labour are given to support a sustainability project
- ⑥ Association: I am a member of an association or club that is engaged in sustainability projects

⑦ Work: My employer is engaged in sustainability projects

## Construct

**When you answer the following questions, please answer with respect to the most recent crowdfunding for sustainability project that you have participated in that you provided above.**

Please choose the closest one to your crowdfunding experience in sustainability sectors [Select one for each] (1: strongly disagree; 2: disagree; 3: somewhat disagree; 4: neither agree nor disagree; 5: somewhat agree; 6: agree; 7: strongly agree).

| <b>CQ1. personality traits</b>                   | Strongly disagree | Disagree | Somewhat disagree | Neither agree nor disagree | Somewhat agree | Agree | Strongly agree |
|--------------------------------------------------|-------------------|----------|-------------------|----------------------------|----------------|-------|----------------|
| 1. I get excited at new ideas.                   | 1                 | 2        | 3                 | 4                          | 5              | 6     | 7              |
| 2. I enjoy thinking about a lot of things.       | 1                 | 2        | 3                 | 4                          | 5              | 6     | 7              |
| 3. I enjoy hearing new ideas.                    | 1                 | 2        | 3                 | 4                          | 5              | 6     | 7              |
| 4. I enjoy looking for a deeper meaning.         | 1                 | 2        | 3                 | 4                          | 5              | 6     | 7              |
| 5. I have a vivid imagination.                   | 1                 | 2        | 3                 | 4                          | 5              | 6     | 7              |
| 6. I tend to implement my plans.                 | 1                 | 2        | 3                 | 4                          | 5              | 6     | 7              |
| 7. I pay attention to detail.                    | 1                 | 2        | 3                 | 4                          | 5              | 6     | 7              |
| 8. I am always well prepared.                    | 1                 | 2        | 3                 | 4                          | 5              | 6     | 7              |
| 9. I tend to abide by my plans.                  | 1                 | 2        | 3                 | 4                          | 5              | 6     | 7              |
| 10. I do my work perfectly.                      | 1                 | 2        | 3                 | 4                          | 5              | 6     | 7              |
| 11. I talk to a lot of other people at parties.  | 1                 | 2        | 3                 | 4                          | 5              | 6     | 7              |
| 12. I feel comfortable with people around me.    | 1                 | 2        | 3                 | 4                          | 5              | 6     | 7              |
| 13. I tend to initiate conversations.            | 1                 | 2        | 3                 | 4                          | 5              | 6     | 7              |
| 14. I make friends easily.                       | 1                 | 2        | 3                 | 4                          | 5              | 6     | 7              |
| 15. I do not mind being the center of attention. | 1                 | 2        | 3                 | 4                          | 5              | 6     | 7              |
| 16. I sympathize with the feelings of others.    | 1                 | 2        | 3                 | 4                          | 5              | 6     | 7              |
| 17. I am concerned about others.                 | 1                 | 2        | 3                 | 4                          | 5              | 6     | 7              |
| 18. I respect others.                            | 1                 | 2        | 3                 | 4                          | 5              | 6     | 7              |
| 19. I believe that others have good intentions.  | 1                 | 2        | 3                 | 4                          | 5              | 6     | 7              |
| 20. I trust what people say to me.               | 1                 | 2        | 3                 | 4                          | 5              | 6     | 7              |
| 21. I get stressed out easily.                   | 1                 | 2        | 3                 | 4                          | 5              | 6     | 7              |
| 22. I worry about many things.                   | 1                 | 2        | 3                 | 4                          | 5              | 6     | 7              |
| 23. I fear the worst.                            | 1                 | 2        | 3                 | 4                          | 5              | 6     | 7              |
| 24. I am filled with doubts.                     | 1                 | 2        | 3                 | 4                          | 5              | 6     | 7              |
| 25. I fall into a panic easily.                  | 1                 | 2        | 3                 | 4                          | 5              | 6     | 7              |

| <b>CQ2. Pro-social behavior on SDGs</b>                    | Strongly disagree | Disagree | Somewhat disagree | Neither agree nor disagree | Somewhat agree | Agree | Strongly agree |
|------------------------------------------------------------|-------------------|----------|-------------------|----------------------------|----------------|-------|----------------|
| 1. Participating in the SDGs is an ethically right action. | 1                 | 2        | 3                 | 4                          | 5              | 6     | 7              |
| 2. Participating in the SDGs is a moral duty.              | 1                 | 2        | 3                 | 4                          | 5              | 6     | 7              |
| 3. Supporting the SDGs is a virtuous behavior.             | 1                 | 2        | 3                 | 4                          | 5              | 6     | 7              |
| 4. Supporting the SDGs is the right thing to do.           | 1                 | 2        | 3                 | 4                          | 5              | 6     | 7              |

| <b>CQ3. Perceived ethics on SDGs</b>                                                                             | Strongly disagree | Disagree | Somewhat disagree | Neither agree nor disagree | Somewhat agree | Agree | Strongly agree |
|------------------------------------------------------------------------------------------------------------------|-------------------|----------|-------------------|----------------------------|----------------|-------|----------------|
| 1. Walking or cycling to reduce CO <sub>2</sub> emission helps the SDGs.                                         | 1                 | 2        | 3                 | 4                          | 5              | 6     | 7              |
| 2. Reducing disposable products (e.g., plastic knives, forks, spoons or Styrofoam cups) contributes to the SDGs. | 1                 | 2        | 3                 | 4                          | 5              | 6     | 7              |

|                                                                                     |   |   |   |   |   |   |   |
|-------------------------------------------------------------------------------------|---|---|---|---|---|---|---|
| 3. Conserving natural resources (e.g., electricity, water) contributes to the SDGs. | 1 | 2 | 3 | 4 | 5 | 6 | 7 |
| 4. Pursuing the SDGs results in better lives.                                       | 1 | 2 | 3 | 4 | 5 | 6 | 7 |

| <b>CQ4. Attachment to crowdfunding for sustainability</b>                      | Strongly disagree | Disagree | Somewhat disagree | Neither agree nor disagree | Somewhat agree | Agree | Strongly agree |
|--------------------------------------------------------------------------------|-------------------|----------|-------------------|----------------------------|----------------|-------|----------------|
| 1. I have deeply involved in participating in crowdfunding for sustainability. | 1                 | 2        | 3                 | 4                          | 5              | 6     | 7              |
| 2. Participating in crowdfunding for sustainability is part of my life.        | 1                 | 2        | 3                 | 4                          | 5              | 6     | 7              |
| 3. I am attached to participating in crowdfunding for sustainability.          | 1                 | 2        | 3                 | 4                          | 5              | 6     | 7              |
| 4. Participating in crowdfunding for sustainability is important to me.        | 1                 | 2        | 3                 | 4                          | 5              | 6     | 7              |

| <b>CQ5. Subjective well-being</b>                                                                                | Strongly disagree | Disagree | Somewhat disagree | Neither agree nor disagree | Somewhat agree | Agree | Strongly agree |
|------------------------------------------------------------------------------------------------------------------|-------------------|----------|-------------------|----------------------------|----------------|-------|----------------|
| 1. Financial support for sustainability crowdfunding is part of my ideal life.                                   | 1                 | 2        | 3                 | 4                          | 5              | 6     | 7              |
| 2. My life is great when I financially support sustainability crowdfunding.                                      | 1                 | 2        | 3                 | 4                          | 5              | 6     | 7              |
| 3. I am happy with my life when financially supporting sustainability crowdfunding.                              | 1                 | 2        | 3                 | 4                          | 5              | 6     | 7              |
| 4. So far, I have gotten the important things that I want by financially supporting sustainability crowdfunding. | 1                 | 2        | 3                 | 4                          | 5              | 6     | 7              |

### **Demographic characteristics**

#### **DQ3. What is the highest level of education you have completed?**

- ① Less than high school or high school diploma ② 2-year degree ③ 4-year degree ④ Graduate School or Graduate Degree

#### **DQ4. What is your marital status?**

- ① Single ② Married ③ Divorced/Separated ④ Widow(er) ⑤ Other (specify) \_\_\_\_\_

#### **DQ5. What is your monthly household income?**

- ① Less than 2.00 million won ② 2.00-3.99 million won ③ 4.00-5.99 million won ④ 6.00-7.99 million won ⑤ 8.00 million won or more

#### **DQ6. What is your main occupation?**

- ① Professional (e.g., attorney, engineer, architect) ② Entrepreneur/Self-employed ③ Service employee ④ Office/Administrative/Clerical ⑤ Civil Servant (Government) ⑥ Home maker ⑦ Retiree ⑧ Student ⑨ Unemployed ⑩ Other (specify) \_\_\_\_\_

#### **DQ7. Where are you living now?**

- ① Seoul ② Busan ③ Daegu ④ Incheon ⑤ Daejeon ⑥ Ulsan ⑦ Gwangju ⑧ Sejong  
⑨ Gyeonggi ⑩ Gangwon ⑪ Chungbuk ⑫ Chungnam ⑬ Jeonbuk ⑭ Jeonnam ⑮ Kyungbuk  
⑯ Gyeongnam ⑰ Jeju

**Thank you very much for your time and participation!**

**Supplemental B.** Quota sampling based on gender and age.

| Factor | Category | The percent of<br>the samples of<br>this study | The percent of<br>mobile internet<br>users |
|--------|----------|------------------------------------------------|--------------------------------------------|
| Gender | Male     | 51.2%                                          | 51.2%                                      |
|        | Female   | 48.8%                                          | 48.8%                                      |
| Age    | 10 to 19 | 16.8%                                          | 16.9%                                      |
|        | 20 to 29 | 17.2%                                          | 17.1%                                      |
|        | 30 to 39 | 17.2%                                          | 17.1%                                      |
|        | 40 to 49 | 17.1%                                          | 17.0%                                      |
|        | 50 to 59 | 16.8%                                          | 16.9%                                      |
|        | 60 to 69 | 14.9%                                          | 15.0%                                      |

*Note:* The percent is based on National Information Society Agency (2020).

### Supplemental C. Common method bias tests.

| Test method                                                | Test                                     | Result                                                                                                                |
|------------------------------------------------------------|------------------------------------------|-----------------------------------------------------------------------------------------------------------------------|
| Exploratory factor analysis (EFA)                          | Eight factors appeared (the total 65.0%) | Since more than one factor appears, and the first factor has less than 50% variance, common method bias is not issue. |
|                                                            | First factor: 29.7%                      |                                                                                                                       |
|                                                            | Second factor: 8.8%                      |                                                                                                                       |
|                                                            | Third factor: 7.9%                       |                                                                                                                       |
|                                                            | Fourth factor: 5.6%                      |                                                                                                                       |
|                                                            | Fifth factor 3.7%                        |                                                                                                                       |
|                                                            | Sixth factor 3.5%                        |                                                                                                                       |
|                                                            | Seventh factor 3.1%                      |                                                                                                                       |
|                                                            | Eighth factor 2.6%                       |                                                                                                                       |
| Comparing single factor and hypotheses (complicated) model | Single factor model:                     | Since the hypotheses model is superior to the single factor model, common method bias is not issue.                   |
|                                                            | SRMR: 0.110 (< 0.08)                     |                                                                                                                       |
|                                                            | AVE: 0.512 (>0.5)                        |                                                                                                                       |
|                                                            | R square: 0.432 (the larger the better)  |                                                                                                                       |
|                                                            | Hypotheses model:                        |                                                                                                                       |
|                                                            | SRMR: 0.096 (< 0.08)                     |                                                                                                                       |
|                                                            | AVE: 0.651>0.5)                          |                                                                                                                       |
|                                                            | R square: 0.517 (the larger the better)  |                                                                                                                       |

Note: All tests show that common method bias is not problem in this study.



**Supplemental D. Demographic characteristic and general information of the entire group.**

| Characteristics                          | n<br>(500) | %<br>(100) | Characteristics                                           | n<br>(500) | %<br>(100) |
|------------------------------------------|------------|------------|-----------------------------------------------------------|------------|------------|
| <b>Gender</b>                            |            |            | <b>Experienced types**</b>                                |            |            |
| Male                                     | 253        | 50.6       | Donation                                                  | 254        | 50.8       |
| Female                                   | 247        | 49.4       | Reward                                                    | 327        | 65.4       |
| <b>Age</b>                               |            |            | Investment (stocks, bonds)                                | 203        | 40.6       |
| Under 20 years old                       | 35         | 7.0        | Lending                                                   | 95         | 19.0       |
| 20 – 29 years old                        | 129        | 25.8       | Other                                                     | 2          | 0.4        |
| 30 – 39 years old                        | 129        | 25.8       | <b>Frequency of crowdfunding</b>                          |            |            |
| 40 – 49 years old                        | 127        | 25.4       | Monthly or more frequently                                | 269        | 53.8       |
| 50 – 59 years old                        | 64         | 12.8       | Quarterly or less frequently                              | 231        | 46.2       |
| 60 years old and over                    | 16         | 3.2        | <b>Investment amount</b>                                  |            |            |
| <b>Educational level</b>                 |            |            | Less than 100,000 KRW                                     | 308        | 61.6       |
| Less than or high school diploma         | 79         | 15.9       | From 100,000 to 999,999 KRW                               | 160        | 32.0       |
| 2-year college                           | 38         | 7.6        | 1,000,000 KRW or more                                     | 32         | 6.4        |
| University                               | 298        | 62.2       | <b>Frequency of sustainability crowdfunding</b>           |            |            |
| Graduate school or higher                | 85         | 13.3       | Monthly or more frequently                                | 215        | 43.0       |
| <b>Marital status</b>                    |            |            | Quarterly or less frequently                              | 285        | 57.0       |
| Single                                   | 267        | 53.4       | <b>Investment amount for sustainability</b>               |            |            |
| Married                                  | 226        | 45.2       | Less than 100,000 KRW                                     | 352        | 70.4       |
| Divorce, separate, or widow/er           | 7          | 1.4        | From 100,000 to 999,999 KRW                               | 131        | 26.2       |
| <b>Monthly household income</b>          |            |            | 1,000,000 KRW or more                                     | 17         | 3.4        |
| Less than 2.00 million KRW*              | 18         | 3.6        | <b>Reason for sustainability crowdfunding</b>             |            |            |
| From 2.00 to 3.99 million KRW            | 132        | 26.4       | Donation                                                  | 141        | 28.2       |
| From 4.00 to 5.99 million KRW            | 134        | 26.8       | Reward                                                    | 208        | 41.6       |
| From 6.00 to 7.99 million KRW            | 96         | 19.2       | Investment (stocks, bonds)                                | 117        | 23.4       |
| From 8.00 to over million KRW            | 120        | 24.0       | Lending                                                   | 32         | 6.4        |
| <b>Occupation</b>                        |            |            | Other                                                     | 2          | 0.4        |
| Professionals                            | 73         | 14.6       | <b>Participated projects in the 17 SDGs</b>               |            |            |
| Business owner                           | 33         | 6.6        | 1. Poverty reduction                                      | 43         | 8.6        |
| Service worker                           | 18         | 3.6        | 2. Reducing hunger/sustainable agriculture/food           | 23         | 4.6        |
| Office worker                            | 232        | 46.4       | 3. Public health and well-being                           | 66         | 13.2       |
| Civil servant                            | 21         | 4.2        | 4. Ensure equitable quality education for all             | 10         | 2.0        |
| Home maker                               | 29         | 5.8        | 5. Achieve gender equality                                | 22         | 4.4        |
| Retiree                                  | 2          | 0.4        | 6. Clean water and public sanitation                      | 22         | 4.4        |
| Student                                  | 71         | 14.2       | 7. Ensure access to sustainable energy                    | 27         | 5.4        |
| Unemployed                               | 10         | 2.0        | 8. Green business practices/employment                    | 46         | 9.2        |
| Other                                    | 11         | 2.2        | 9. Build resilient infrastructure                         | 42         | 8.4        |
| <b>Residential district</b>              |            |            | 10. Reduce inequality within/among countries              | 20         | 4.0        |
| Metropolitan areas                       | 332        | 66.4       | 11. Build resilient and sustainable cities                | 25         | 5.0        |
| Non-metropolitan areas                   | 168        | 33.6       | 12. Waste reduction and recycling                         | 45         | 9.0        |
| <b>Participation length</b>              |            |            | 13. Urgent action on climate change                       | 21         | 4.2        |
| Less than 7 months                       | 229        | 45.8       | 14. Conserve marine ecosystems                            | 23         | 4.6        |
| 7 or more months                         | 271        | 54.2       | 15. Conserve terrestrial ecosystems                       | 38         | 7.6        |
| <b>Overseas funding</b>                  |            |            | 16. Promote peaceful societies/reduce violence            | 17         | 3.4        |
| Yes                                      | 101        | 20.2       | 17. Strengthen global partnership                         | 10         | 2.0        |
| No                                       | 399        | 79.8       | <b>Characteristics of crowdfunding for sustainability</b> |            |            |
| <b>Overseas sustainability funding</b>   |            |            | Profit crowdfunding project                               | 197        | 39.4       |
| Yes                                      | 64         | 12.8       | Non-profit crowdfunding project                           | 205        | 41.0       |
| No                                       | 436        | 87.2       | Don't know                                                | 98         | 19.6       |
| <b>Used platforms for sustainability</b> |            |            | <b>Experience of non-crowdfunding for sustainability</b>  |            |            |
| OhMyCompnay                              | 42         | 8.4        | Yes                                                       | 64         | 12.8       |
| Wadiz                                    | 235        | 47.0       | No                                                        | 436        | 87.2       |
| Crowdy                                   | 34         | 6.8        | <b>Participated overseas projects in the 17 SDGs</b>      | n=64       |            |
| Tumblebug                                | 49         | 9.8        | Fair distribution (SDGs 1, 2, 3, 4, 5, 10,16, 17)         | 25         | 39.0       |
| HappyBean                                | 99         | 19.8       | Efficient allocation (SDGs 7, 8, 9, 11, 12)               | 24         | 37.5       |
| Other                                    | 41         | 8.2        | Sustainable scale (SDGs 6, 13, 14, 15)                    | 15         | 23.5       |

Note: \*US\$ 1 = KRW (Korean Won) 1,194 as of March 3, 2020. \*\*Multi-response.

**Supplemental E.** Descriptive statistics and normal distribution test.

| Construct                                       | Items no. | Minimum | Maximum | Mean  | Standard deviation | Kurtosis | Skewness |
|-------------------------------------------------|-----------|---------|---------|-------|--------------------|----------|----------|
| Openness                                        | Item 1    | 1       | 7       | 5.250 | 1.117              | 0.076    | -0.358   |
|                                                 | Item 2    | 1       | 7       | 5.338 | 1.144              | 0.147    | -0.487   |
|                                                 | Item 3    | 2       | 7       | 5.448 | 1.058              | -0.512   | -0.310   |
|                                                 | Item 4    | 2       | 7       | 5.296 | 1.123              | -0.139   | -0.466   |
|                                                 | Item 5    | 1       | 7       | 5.012 | 1.188              | -0.030   | -0.267   |
| Conscientiousness                               | Item 1    | 2       | 7       | 5.114 | 1.092              | -0.105   | -0.311   |
|                                                 | Item 2    | 1       | 7       | 5.144 | 1.099              | 0.609    | -0.542   |
|                                                 | Item 3    | 1       | 7       | 4.584 | 1.169              | -0.040   | -0.011   |
|                                                 | Item 4    | 1       | 7       | 4.926 | 1.160              | 0.020    | -0.357   |
|                                                 | Item 5    | 1       | 7       | 4.888 | 1.168              | 0.586    | -0.530   |
| Extraversion                                    | Item 1    | 1       | 7       | 4.734 | 1.283              | -0.369   | -0.211   |
|                                                 | Item 2    | 2       | 7       | 4.900 | 1.113              | -0.148   | -0.282   |
|                                                 | Item 3    | 1       | 7       | 4.580 | 1.287              | -0.287   | -0.203   |
|                                                 | Item 4    | 1       | 7       | 4.402 | 1.377              | -0.483   | -0.104   |
|                                                 | Item 5    | 1       | 7       | 4.424 | 1.396              | -0.334   | -0.206   |
| Agreeableness                                   | Item 1    | 1       | 7       | 5.228 | 1.151              | 0.863    | -0.738   |
|                                                 | Item 2    | 1       | 7       | 4.888 | 1.149              | 0.540    | -0.455   |
|                                                 | Item 3    | 1       | 7       | 5.370 | 0.991              | 0.657    | -0.497   |
|                                                 | Item 4    | 1       | 7       | 4.794 | 1.129              | 0.320    | -0.391   |
|                                                 | Item 5    | 1       | 7       | 4.832 | 1.126              | 0.131    | -0.281   |
| Neuroticism                                     | Item 1    | 1       | 7       | 4.594 | 1.451              | -0.351   | -0.365   |
|                                                 | Item 2    | 1       | 7       | 4.622 | 1.398              | -0.256   | -0.415   |
|                                                 | Item 3    | 1       | 7       | 4.606 | 1.524              | -0.463   | -0.408   |
|                                                 | Item 4    | 1       | 7       | 4.542 | 1.383              | -0.324   | -0.288   |
|                                                 | Item 5    | 1       | 7       | 4.180 | 1.394              | -0.491   | -0.040   |
| Perceived ethics on<br>SDGs                     | Item 1    | 1       | 7       | 5.462 | 1.207              | 1.002    | -0.910   |
|                                                 | Item 2    | 1       | 7       | 5.622 | 1.206              | 0.836    | -0.909   |
|                                                 | Item 3    | 1       | 7       | 5.434 | 1.196              | 1.032    | -0.900   |
|                                                 | Item 4    | 2       | 7       | 5.476 | 1.072              | 0.061    | -0.480   |
| Pro-social behavior<br>on SDGs                  | Item 1    | 1       | 7       | 5.172 | 1.145              | 0.335    | -0.477   |
|                                                 | Item 2    | 1       | 7       | 4.590 | 1.362              | 0.008    | -0.326   |
|                                                 | Item 3    | 1       | 7       | 5.314 | 1.082              | 0.335    | -0.516   |
|                                                 | Item 4    | 1       | 7       | 5.278 | 1.043              | 0.171    | -0.374   |
| Attachment to<br>sustainability<br>crowdfunding | Item 1    | 1       | 7       | 4.126 | 1.314              | -0.004   | -0.080   |
|                                                 | Item 2    | 1       | 7       | 4.034 | 1.385              | -0.240   | -0.115   |
|                                                 | Item 3    | 1       | 7       | 4.392 | 1.372              | -0.182   | -0.297   |
|                                                 | Item 4    | 1       | 7       | 4.442 | 1.277              | 0.134    | -0.281   |
| Subjective<br>well-being                        | Item 1    | 1       | 7       | 4.636 | 1.274              | 0.208    | -0.271   |
|                                                 | Item 2    | 1       | 7       | 4.630 | 1.185              | 0.349    | -0.265   |
|                                                 | Item 3    | 1       | 7       | 4.832 | 1.112              | 0.895    | -0.506   |
|                                                 | Item 4    | 1       | 7       | 4.558 | 1.188              | 0.162    | -0.149   |

*Note:* When an item has normal distribution, the absolute value of kurtosis and skewness is within 1.000. The item in italic has non-normality distribution.

## Supplemental F. Measurements.

| Constructs                                                                                                       | Factor loading | VIF** |
|------------------------------------------------------------------------------------------------------------------|----------------|-------|
| <b>Openness</b>                                                                                                  |                |       |
| 1. I get excited at new ideas.                                                                                   | 0.845          | 2.130 |
| 2. I enjoy thinking about a lot of things.                                                                       | 0.809          | 1.963 |
| 3. I enjoy hearing new ideas.                                                                                    | 0.831          | 2.028 |
| 4. I enjoy looking for a deeper meaning.                                                                         | 0.712          | 1.440 |
| 5. I have a vivid imagination.                                                                                   | 0.748          | 1.788 |
| <b>Conscientiousness</b>                                                                                         |                |       |
| 1. I tend to implement my plans.                                                                                 | 0.814          | 1.925 |
| 2. I pay attention to detail.                                                                                    | 0.701          | 1.322 |
| 3. I am always well prepared.                                                                                    | 0.741          | 1.653 |
| 4. I tend to abide by my plans.                                                                                  | 0.786          | 1.850 |
| 5. I do my work perfectly.                                                                                       | 0.772          | 1.769 |
| <b>Extraversion</b>                                                                                              |                |       |
| 1. I talk to a lot of other people at parties.                                                                   | 0.805          | 1.986 |
| 2. I feel comfortable with people around me.                                                                     | 0.761          | 1.323 |
| 3. I tend to initiate conversations.                                                                             | 0.795          | 1.894 |
| 4. I make friends easily.                                                                                        | 0.780          | 2.022 |
| 5. I do not mind being the center of attention.                                                                  | 0.674          | 1.555 |
| <b>Agreeableness</b>                                                                                             |                |       |
| 1. I sympathize with the feelings of others.                                                                     | 0.742          | 1.435 |
| 2. I am concerned about others.                                                                                  | 0.716          | 1.449 |
| 3. I respect others.                                                                                             | 0.760          | 1.410 |
| 4. I believe that others have good intentions.                                                                   | 0.699          | 1.527 |
| 5. I trust what people say to me.                                                                                | 0.666          | 1.481 |
| <b>Neuroticism</b>                                                                                               |                |       |
| 1. I get stressed out easily.                                                                                    | 0.856          | 1.507 |
| 2. I worry about many things.                                                                                    | 0.905          | 1.716 |
| 3. I fear the worst.                                                                                             | 0.587          | 1.459 |
| 4. I am filled with doubts.*                                                                                     | -              | -     |
| 5. I fall into a panic easily.*                                                                                  | -              | -     |
| <b>Perceived ethics on SDGs</b>                                                                                  |                |       |
| 1. Walking or cycling to reduce CO <sub>2</sub> emission helps the SDGs.                                         | 0.864          | 2.338 |
| 2. Reducing disposable products (e.g., plastic knives, forks, spoons or Styrofoam cups) contributes to the SDGs. | 0.860          | 2.191 |
| 3. Conserving natural resources (e.g., electricity, water) contributes to the SDGs.                              | 0.854          | 2.262 |
| 4. Pursuing the SDGs results in better lives.                                                                    | 0.814          | 1.793 |
| <b>Pro-social behavior on SDGs</b>                                                                               |                |       |
| 1. Participating in the SDGs is an ethically right action.                                                       | 0.862          | 2.150 |
| 2. Participating in the SDGs is a moral duty.                                                                    | 0.730          | 1.564 |
| 3. Supporting the SDGs is a virtuous behavior.                                                                   | 0.806          | 1.840 |
| 4. Supporting the SDGs is the right thing to do.                                                                 | 0.873          | 2.231 |
| <b>Attachment to sustainability crowdfunding</b>                                                                 |                |       |
| 1. I have been deeply involved in participating in crowdfunding for sustainability.                              | 0.878          | 2.653 |
| 2. Participating in crowdfunding for sustainability is part of my life.                                          | 0.898          | 3.040 |
| 3. I am attached to participating in crowdfunding for sustainability.                                            | 0.877          | 2.536 |
| 4. Participating in crowdfunding for sustainability is important to me.                                          | 0.897          | 2.847 |
| <b>Subjective well-being</b>                                                                                     |                |       |
| 1. Financial support for sustainability crowdfunding is part of my ideal life.                                   | 0.864          | 2.258 |
| 2. My life is great when I financially support sustainability crowdfunding.                                      | 0.860          | 2.235 |
| 3. I am happy with my life when financially supporting sustainability crowdfunding.                              | 0.863          | 2.298 |
| 4. So far, I have gotten the important things that I want by financially supporting sustainability crowdfunding. | 0.846          | 2.110 |

\*items were deleted after confirmatory factor analysis. \*\*Variance inflation factor of multicollinearity.

**Supplemental G. Mediating effect.**

| Path                                                                            | Coefficient         | t-value | p-value |
|---------------------------------------------------------------------------------|---------------------|---------|---------|
| Openness → Attachment to sustainability crowdfunding (mediator: value)          | 0.088***            | 3.867   | < 0.001 |
| Openness → Subjective well-being (mediators: value and attachment)              | 0.108***            | 3.812   | < 0.001 |
| Conscientiousness → Attachment to sustainability crowdfunding (mediator: value) | 0.061**             | 2.763   | < 0.01  |
| Conscientiousness → Subjective well-being (mediators: value and attachment)     | 0.074**             | 2.789   | < 0.01  |
| Extraversion → Attachment to sustainability crowdfunding (mediator: value)      | -0.066***           | 3.392   | < 0.001 |
| Extraversion → Subjective well-being (mediators: value and attachment)          | -0.081***           | 3.320   | < 0.001 |
| Agreeableness → Attachment to sustainability crowdfunding (mediator: value)     | 0.162***            | 5.273   | < 0.001 |
| Agreeableness → Subjective well-being (mediators: value and attachment)         | 0.197***            | 5.591   | < 0.001 |
| Neuroticism → Attachment to sustainability crowdfunding (mediator: value)       | 0.000 <sup>ns</sup> | 0.014   | ns      |
| Neuroticism → Subjective well-being (mediators: value and attachment)           | 0.000 <sup>ns</sup> | 0.014   | ns      |
| Value on SDGs → Subjective well-being (mediator: attachment)                    | 0.230***            | 8.179   | < 0.001 |

Note: \*\*\*p<0.001; \*\*p<0.01. ns = non-significant.
